# Supplementary figures and images for: It Takes a Community to Raise the Prevalence of a Zoonotic Pathogen
Source: Hindawi journal article supplement (doi:10.1155/2011/741406), 2011-01-01

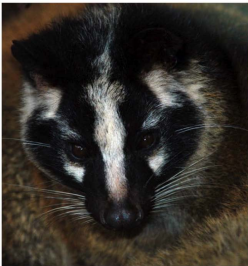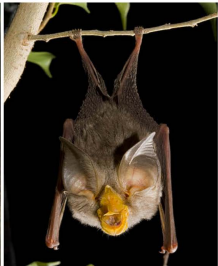

Supplement: f1 [file 741406.f1.pdf]
